# Supplementary material for: Degradation of ibuprofen using ozone combined with peroxymonosulfate
Source: Royal Society of Chemistry journal article supplement (doi:10.1039/c7ew00174f), 2017-01-01

## Electronic Supplementary Information

### Degradation of Ibuprofen Using Ozone Combined with Peroxymonosulfate

Zhen Yuan,<sup>†</sup> Minghao Sui,<sup>†\*</sup> Bojie Yuan,<sup>†</sup> Pan Li,<sup>†</sup> Jingyu Wang,<sup>†</sup> Jie Qin,<sup>†</sup> Guangyi Xu,<sup>†</sup>

<sup>†</sup> State Key Laboratory of Pollution Control and Resource Reuse, College of Environmental Science and Engineering, Tongji University, #1239 Siping Road, Shanghai 200092, People's Republic of China.

\*Corresponding author phone: +86 21 65982691; email: [minghaosui@tongji.edu.cn](mailto:minghaosui@tongji.edu.cn)

### Caption of Supplementary Figures

**Figure S1.** Degradation of IBP (A) and BA (B) by UV and UV/PDS and IBP vs BA (C).

**Figure S2.** Speciation of PMS under different pH.

**Figure S3.** Degradation of IBP in authentic water matrix (a), fitting of kinetic model (b).

**Figure S4.** Ozone consumption in the authentic water.

**Figure S1.** Degradation of IBP (A) and BA (B) by UV and UV/PDS and IBP vs BA (C). (Experimental conditions:  $[IBP]_0=5 \mu\text{M}$  or  $1.0 \text{ mg/L}$ ,  $[PDS]_0=1.0 \text{ mM}$  or  $270.3 \text{ mg/L}$ , UV irradiation intensity:  $30 \mu\text{W/cm}^2$ )

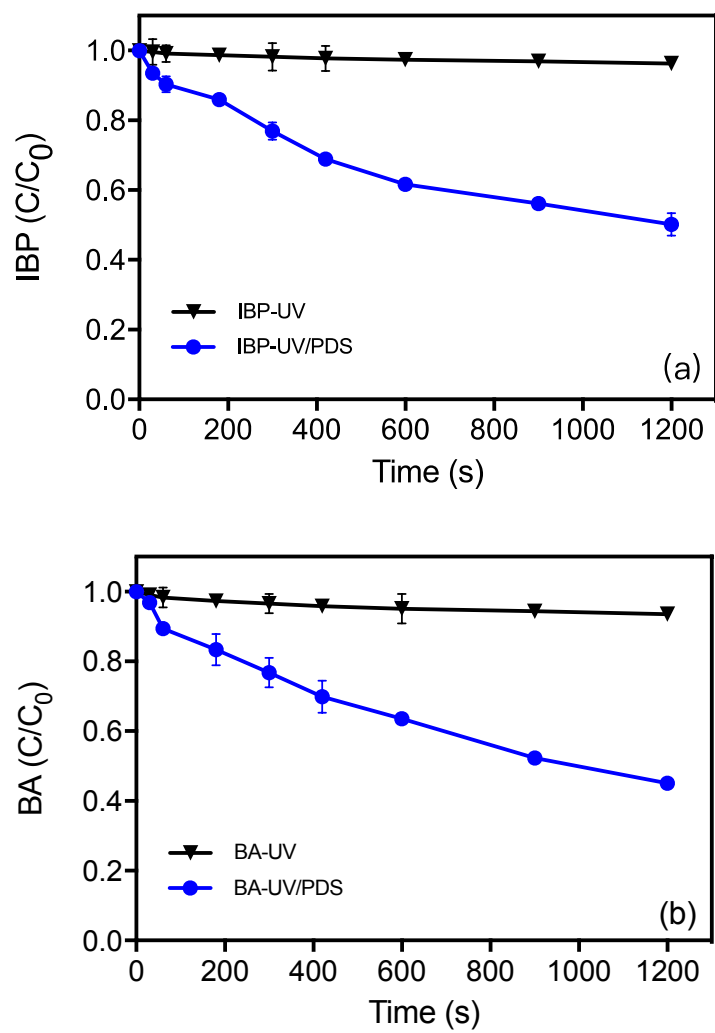

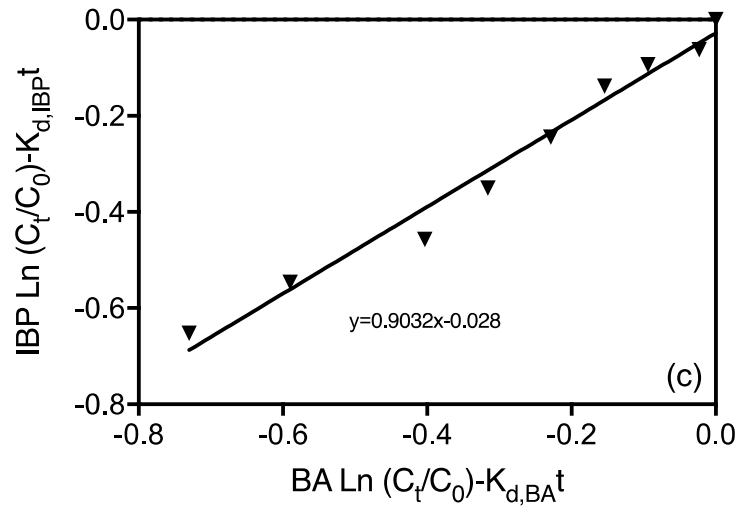

**Figure S2.** Speciation of PMS under different pH.

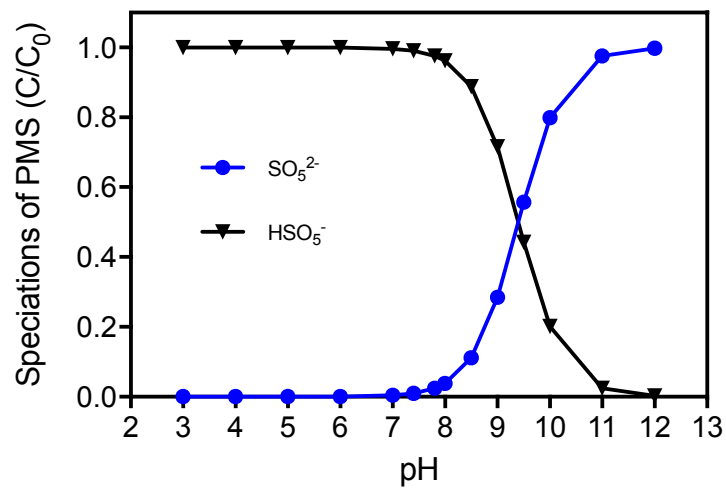

**Figure S3.** Degradation of IBP in authentic water matrix (a), fitting of kinetic model (b).

(Experimental conditions:  $[IBP]_0 = 5 \mu\text{M}$  or  $1.0 \text{ mg/L}$ ,  $[O_3]_0 = 31.3 \mu\text{M}$  or  $1.5 \text{ mg/L}$ ,  $[PMS]_0 = 6.5 \mu\text{M}$  or

$2.0 \text{ mg/L}$ )

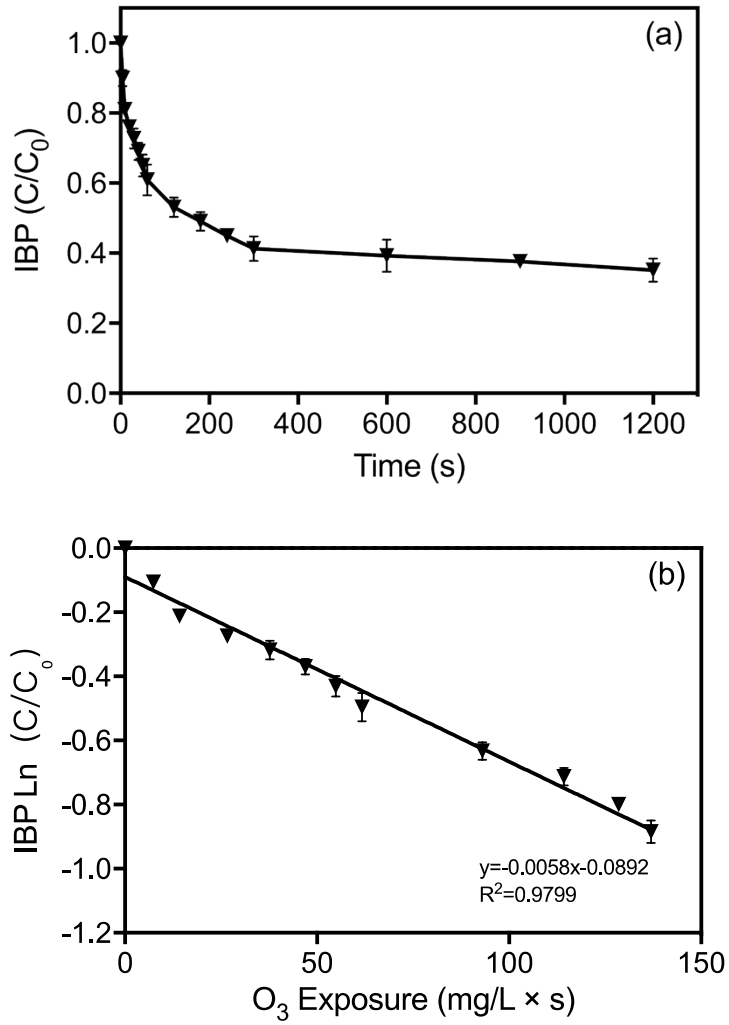

**Figure S4.** Ozone consumption in the authentic water. (Experimental conditions:  $[IBP]_0 = 5 \mu M$  or  $1.0 mg/L$ ,  $[O_3]_0 = 31.3 \mu M$  or  $1.5 mg/L$ ,  $[PMS]_0 = 6.5 \mu M$  or  $2.0 mg/L$ ).

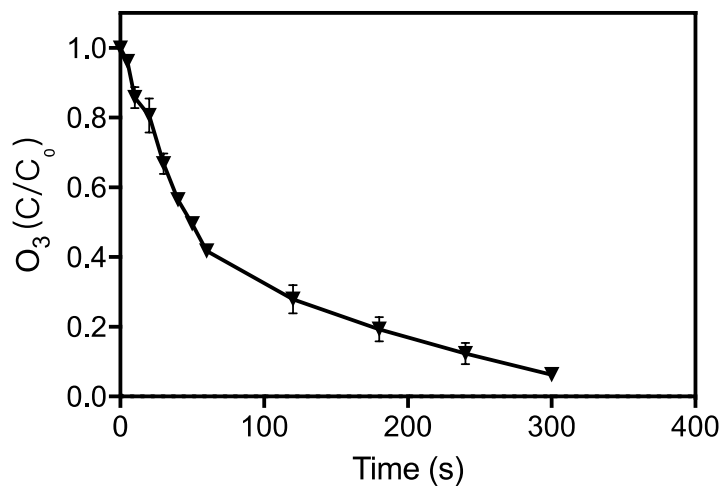

Supplement: c7ew00174f1.pdf [file c7ew00174f1.pdf]
